# Supplementary material for: phyLoSTM: a novel deep learning model on disease prediction from longitudinal microbiome data
Source: Oxford University Press journal article supplement (doi:10.1093/bioinformatics/btab482), 2021-06-30
Supplement: btab482_supplementary_data.pdf [file btab482_supplementary_data.pdf]

# Supplementary Material for ‘phyLoSTM: A Novel Deep Learning model on Disease Prediction from Longitudinal Microbiome data’

## Contents

|          |                              |           |
|----------|------------------------------|-----------|
| <b>1</b> | <b>Supplementary Tables</b>  | <b>4</b>  |
| <b>2</b> | <b>Supplementary Figures</b> | <b>27</b> |
| <b>3</b> | <b>References</b>            | <b>35</b> |

## List of Supplementary Tables

|   |                                                                                                                                                                                                                                                                                                                                                                                                                                        |    |
|---|----------------------------------------------------------------------------------------------------------------------------------------------------------------------------------------------------------------------------------------------------------------------------------------------------------------------------------------------------------------------------------------------------------------------------------------|----|
| 1 | Results evaluating performance of our model by changing network parameters on the simulated data. The boldfaced attributes represent the parameter values for which the model performs the best. . . . .                                                                                                                                                                                                                               | 4  |
| 2 | Table detailing the clusters in the DIABIMMUNE three country cohort [1] based on the phyla containing maximum number of OTUs. The right handside represents the species in each cluster. The numbering provided to each species provides a unique identifier to each OTU which is further used in Heatmaps as labels for the x and y axis, in Supplementary Figure 1, 2 and 3 to illustrate the correlations between the OTUs. . . . . | 5  |
| 3 | Association of environmental variables to various allergy outcomes in the DIABIMMUNE three country cohort. . . . .                                                                                                                                                                                                                                                                                                                     | 18 |
| 4 | Distribution of samples into cases and controls, in each allergy outcome in the DIABIMMUNE three country cohort. . . . .                                                                                                                                                                                                                                                                                                               | 19 |

|    |                                                                                                                                                                                                                                                                                                                                                                      |    |
|----|----------------------------------------------------------------------------------------------------------------------------------------------------------------------------------------------------------------------------------------------------------------------------------------------------------------------------------------------------------------------|----|
| 5  | AUC values tabulated for neural network models on test set of DIABIMMUNE three country cohort. The results are reported on considering model performance without (w/o) weight balancing in the neural network and with weight balancing in the neural network. Note the consistent increase in AUC as shown in column 3, 5, 7 and 9, using weight balancing. . . . . | 20 |
| 6  | Association of environmental variables to preterm birth outcome in the DiGiulio case-control study. . . . .                                                                                                                                                                                                                                                          | 21 |
| 7  | AUC as obtained by various feature extraction techniques combined with LSTM module to identify temporal dependency in DIABIMMUNE three country cohort with overall allergy as outcome. Alongwith conventional ML models, Multi dimensional feature selection [2] is also used for comparison against taxoNN for feature extraction. . . . .                          | 22 |
| 8  | Comparison of AUC values obtained on the test set of OTUs from metagenomic dataset and 16s dataset of the DIABIMMUNE three country cohort on the 'Overall Allergy' outcome. . . . .                                                                                                                                                                                  | 23 |
| 9  | AUC values tabulated for various machine learning methods upon class based stratification for DIABIMMUNE three country and DiGuilio preterm studies. . . .                                                                                                                                                                                                           | 24 |
| 10 | Comparison of AUCs as obtained by phyLoSTM methodology incorporating temporal data across 6 time points in the DIABIMMUNE cohort for the overall allergy outcome with conventional ML models taking data from individual time points as inputs. . . . .                                                                                                              | 25 |
| 11 | Comparison of AUCs as obtained by phyLoSTM methodology incorporating temporal data across 6 time points in the DiGiulio preterm study with conventional ML models taking data from individual time points as inputs. . . . .                                                                                                                                         | 26 |

**List of Supplementary Figures**

|   |                                                                                                                                                                                                                    |    |
|---|--------------------------------------------------------------------------------------------------------------------------------------------------------------------------------------------------------------------|----|
| 1 | Heatmaps for the Spearman rank of the OTUs in the cluster, Phylum Proteobacteria, (a) before ordering and (b) after the ordering based on correlation of the OTUs in the DIABIMMUNE three country cohort . . . . . | 28 |
| 2 | Heatmaps for the Spearman rank of the OTUs in the cluster, Phylum Firmicutes, (a) before ordering and (b) after the ordering based on correlation of the OTUs in the DIABIMMUNE three country cohort . . . . .     | 29 |

|   |                                                                                                                                                                                                                                                                                                                                                                                                                                                                                                                                             |    |
|---|---------------------------------------------------------------------------------------------------------------------------------------------------------------------------------------------------------------------------------------------------------------------------------------------------------------------------------------------------------------------------------------------------------------------------------------------------------------------------------------------------------------------------------------------|----|
| 3 | Heatmaps for the Spearman rank of the OTUs in the cluster, Phylum Bacteroidetes, (a) before ordering and (b) after the ordering based on correlation of the OTUs in the DIABIMMUNE three country cohort . . . . .                                                                                                                                                                                                                                                                                                                           | 30 |
| 4 | Comparison of AUC values as observed at each individual 6 time points using <i>taxoNN<sub>corr</sub></i> approach with the final higher AUC value of 0.897 using proposed phyLoSTM framework on the simulated study. . . . .                                                                                                                                                                                                                                                                                                                | 31 |
| 5 | Relative abundance of OTUs in each phylum of the DiGiulio study at four time points measured every three months. For each box plot the upper whisker extends from the hinge to the largest value no further than 1.5 * IQR from the hinge (where IQR is the inter-quartile range, or distance between the first and third quartiles). The lower whisker extends from the hinge to the smallest value at most 1.5 * IQR of the hinge. Data beyond the end of the whiskers are called "outlying" points and are plotted individually. . . . . | 32 |
| 6 | 95% confidence intervals obtained for the mean AUC values for 10 times 10-fold cross validation on the training set for the DiGiulio study on the preterm delivery output [3] . . . . .                                                                                                                                                                                                                                                                                                                                                     | 33 |
| 7 | Relative abundance of OTUs in each phylum of the DIABIMMUNE three country cohort at six time points measured half-yearly upto age of three of the infant. For each box plot the upper whisker extends from the hinge to the largest value no further than 1.5 * IQR from the hinge (where IQR is the inter-quartile range, or distance between the first and third quartiles). The lower whisker extends from the hinge to the smallest value at most 1.5 * IQR of the hinge. . . . .                                                       | 34 |

## 1 Supplementary Tables

Supplementary Table 1: Results evaluating performance of our model by changing network parameters on the simulated data. The boldfaced attributes represent the parameter values for which the model performs the best.

| Performance Analysis |           |              |
|----------------------|-----------|--------------|
| Parameter            | Values    | AUC          |
| Stride Size          | <b>1</b>  | <b>0.878</b> |
|                      | 2         | 0.856        |
|                      | 3         | 0.844        |
|                      | 4         | 0.821        |
|                      | 5         | 0.806        |
| Window Size          | 3         | 0.822        |
|                      | 4         | 0.844        |
|                      | <b>5</b>  | <b>0.871</b> |
|                      | 6         | 0.849        |
|                      | 7         | 0.838        |
| No. of filters       | 16        | 0.839        |
|                      | <b>32</b> | <b>0.871</b> |
|                      | 64        | 0.848        |
| No. of Causal OTUs   | 8         | 0.787        |
|                      | 16        | 0.841        |
|                      | <b>32</b> | <b>0.875</b> |

Supplementary Table 2: Table detailing the clusters in the DIABIMMUNE three country cohort [1] based on the phyla containing maximum number of OTUs. The right handside represents the species in each cluster. The numbering provided to each species provides a unique identifier to each OTU which is further used in Heatmaps as labels for the x and y axis, in Supplementary Figure 1, 2 and 3 to illustrate the correlations between the OTUs.

| <b>OTUs in DIABIMMUNE Three country cohort</b> |                  |                                                                                                                                                                                                                                                                                                                                                                                                                                                                                                                                                                                                                                                                                                                                                                                                                                                                                                                                                                                                                                                                                            |
|------------------------------------------------|------------------|--------------------------------------------------------------------------------------------------------------------------------------------------------------------------------------------------------------------------------------------------------------------------------------------------------------------------------------------------------------------------------------------------------------------------------------------------------------------------------------------------------------------------------------------------------------------------------------------------------------------------------------------------------------------------------------------------------------------------------------------------------------------------------------------------------------------------------------------------------------------------------------------------------------------------------------------------------------------------------------------------------------------------------------------------------------------------------------------|
| <b>Cluster</b>                                 | <b>Phylum</b>    | <b>Species</b>                                                                                                                                                                                                                                                                                                                                                                                                                                                                                                                                                                                                                                                                                                                                                                                                                                                                                                                                                                                                                                                                             |
| Cluster 1                                      | p_Proteobacteria | 1. s__Brevundimonas_diminuta<br>2.s__Brevundimonas_unclassified<br>3.s__Bartonella_unclassified<br>4.s__Agrobacterium_tumefaciens<br>5.s__Agrobacterium_unclassified<br>6.s__Shinella_zoogloeoides<br>7.s__Paracoccus_unclassified<br>8.s__Gluconobacter_frateurii<br>9.s__Sphingobium_unclassified<br>10.s__Sphingobium_yanoikuyae<br>11.s__Bordetella_bronchiseptica_parapertussis<br>12.s__Bordetella_pertussis<br>13.s__Burkholderia_unclassified<br>14.s__Cupriavidus_unclassified<br>15.s__Lautropia_mirabilis<br>16.s__Ralstonia_pickettii<br>17.s__Ralstonia_unclassified<br>18.s__Burkholderiales_bacterium_1_1_47<br>19.s__Comamonas_unclassified<br>20.s__Variovorax_unclassified<br>21.s__Oxalobacter_formigenes<br>22.s__Parasutterella_excrementihominis<br>23.s__Sutterella_parvirubra<br>24.s__Sutterella_wadsworthensis<br>25.s__Eikenella_corrodens<br>26.s__Neisseria_elongata<br>27.s__Neisseria_flavescens<br>28.s__Neisseria_meningitidis<br>29.s__Neisseria_subflava<br>30.s__Neisseria_unclassified<br>31.s__Bilophila_unclassified<br>32.s__Bilophila_wadsworthia |

33.s\_\_Desulfovibrio\_desulfuricans  
34.s\_\_Desulfovibrio\_piger  
35.s\_\_Campylobacter\_conciscus  
36.s\_\_Campylobacter\_curvus  
37.s\_\_Campylobacter\_gracilis  
38.s\_\_Campylobacter\_jejuni  
39.s\_\_Campylobacter\_showae  
40.s\_\_Campylobacter\_upsaliensis  
41.s\_\_Campylobacter\_ureolyticus  
42.s\_\_Aeromonas\_caviae  
43.s\_\_Aeromonas\_unclassified  
44.s\_\_Aeromonas\_veronii  
45.s\_\_Succinatimonas\_hippeii  
46.s\_\_Spiribacter\_unclassified  
47.s\_\_Buchnera\_aphidicola  
48.s\_\_Citrobacter\_freundii  
49.s\_\_Citrobacter\_koseri  
50.s\_\_Citrobacter\_unclassified  
51.s\_\_Citrobacter\_youngae  
52.s\_\_Cronobacter\_sakazakii  
53.s\_\_Enterobacteriaceae\_bacterium\_9\_2\_54FAA  
54.s\_\_Enterobacter\_aerogenes  
55.s\_\_Enterobacter\_cloacae  
56.s\_\_Enterobacter\_hormaechei  
57.s\_\_Escherichia\_albertii  
58.s\_\_Escherichia\_coli  
59.s\_\_Escherichia\_hermannii  
60.s\_\_Escherichia\_unclassified  
61.s\_\_Hafnia\_alvei  
62.s\_\_Klebsiella\_oxytoca  
63.s\_\_Klebsiella\_pneumoniae  
64.s\_\_Klebsiella\_sp\_MS\_92\_3  
65.s\_\_Klebsiella\_unclassified  
66.s\_\_Morganella\_morganii  
67.s\_\_Pantoea\_agglomerans  
68.s\_\_Pantoea\_unclassified  
69.s\_\_Proteus\_mirabilis  
70.s\_\_Proteus\_penneri  
71.s\_\_Proteus\_unclassified  
72.s\_\_Providencia\_unclassified  
73.s\_\_Raoultella\_ornithinolytica  
74.s\_\_Salmonella\_enterica

|           |              |                                                                                                                                                                                                                                                                                                                                                                                                                                                                                                                                                                                                                                                                                                                                                                                                                                                                                                                                                                                                                                                                                                                                                                                                                |
|-----------|--------------|----------------------------------------------------------------------------------------------------------------------------------------------------------------------------------------------------------------------------------------------------------------------------------------------------------------------------------------------------------------------------------------------------------------------------------------------------------------------------------------------------------------------------------------------------------------------------------------------------------------------------------------------------------------------------------------------------------------------------------------------------------------------------------------------------------------------------------------------------------------------------------------------------------------------------------------------------------------------------------------------------------------------------------------------------------------------------------------------------------------------------------------------------------------------------------------------------------------|
|           |              | <p>75.s__Salmonella_unclassified<br/> 76.s__Serratia_liquefaciens<br/> 77.s__Shigella_flexneri<br/> 78.s__Shigella_sonnei<br/> 79.s__Yersinia_enterocolitica<br/> 80.s__Yersinia_unclassified<br/> 81.s__Halomonas_unclassified<br/> 82.s__Actinobacillus_unclassified<br/> 83.s__Aggregatibacter_aphrophilus<br/> 84.s__Aggregatibacter_segnis<br/> 85.s__Aggregatibacter_unclassified<br/> 86.s__Haemophilus_haemolyticus<br/> 87.s__Haemophilus_influenzae<br/> 88.s__Haemophilus_paraahaemolyticus<br/> 89.s__Haemophilus_parainfluenzae<br/> 90.s__Haemophilus_paraphroahaemolyticus<br/> 91.s__Haemophilus_pittmaniae<br/> 92.s__Haemophilus_sputorum<br/> 93.s__Acinetobacter_baumannii<br/> 94.s__Acinetobacter_guillouiae<br/> 95.s__Acinetobacter_johnsonii<br/> 96.s__Acinetobacter_junii<br/> 97.s__Acinetobacter_pittii_calcoaceticus_nosocomialis<br/> 98.s__Acinetobacter_unclassified<br/> 99.s__Acinetobacter_ursingii<br/> 100.s__Enhydrobacter_aerosaccus<br/> 101.s__Cellvibrio_unclassified<br/> 102.s__Pseudomonas_alcaligenes<br/> 103.s__Pseudomonas_fragi<br/> 104.s__Pseudomonas_unclassified<br/> 105.s__Stenotrophomonas_maltophilia<br/> 106.s__Stenotrophomonas_unclassified</p> |
| Cluster 2 | p_Firmicutes | <p>107. s__Gemella_haemolysans<br/> 108.s__Gemella_sanguinis<br/> 109.s__Gemella_unclassified<br/> 110.s__Macrococcus_caseolyticus<br/> 111.s__Staphylococcus_aureus<br/> 112.s__Staphylococcus_caprae_capitis<br/> 113.s__Staphylococcus_epidermidis<br/> 114.s__Staphylococcus_haemolyticus<br/> 115.s__Staphylococcus_hominis<br/> 116.s__Staphylococcus_lugdunensis</p>                                                                                                                                                                                                                                                                                                                                                                                                                                                                                                                                                                                                                                                                                                                                                                                                                                    |

117.s\_\_Staphylococcus\_saprophyticus  
118.s\_\_Abiotrophia\_defectiva  
119.s\_\_Carnobacterium\_maltaromaticum  
120.s\_\_Granulicatella\_adiacens  
121.s\_\_Granulicatella\_elegans  
122.s\_\_Granulicatella\_unclassified  
123.s\_\_Enterococcus\_avium  
124.s\_\_Enterococcus\_casseliflavus  
125.s\_\_Enterococcus\_cecorum  
126.s\_\_Enterococcus\_dispar  
127.s\_\_Enterococcus\_durans  
128.s\_\_Enterococcus\_faecalis  
129.s\_\_Enterococcus\_faecium  
130.s\_\_Enterococcus\_gallinarum  
131.s\_\_Enterococcus\_gilvus  
132.s\_\_Enterococcus\_hirae  
133.s\_\_Enterococcus\_italicus  
134.s\_\_Enterococcus\_malodoratus  
135.s\_\_Enterococcus\_raffinosis  
136.s\_\_Lactobacillus\_acidophilus  
137.s\_\_Lactobacillus\_amylovorus  
138.s\_\_Lactobacillus\_brevis  
139.s\_\_Lactobacillus\_buchneri  
140.s\_\_Lactobacillus\_casei\_paracasei  
141.s\_\_Lactobacillus\_coryniformis  
142.s\_\_Lactobacillus\_curvatus  
143.s\_\_Lactobacillus\_delbrueckii  
144.s\_\_Lactobacillus\_fermentum  
145.s\_\_Lactobacillus\_gasseri  
146.s\_\_Lactobacillus\_helveticus  
147.s\_\_Lactobacillus\_hilgardii  
148.s\_\_Lactobacillus\_johnsonii  
149.s\_\_Lactobacillus\_kefiranofaciens  
150.s\_\_Lactobacillus\_mucosae  
151.s\_\_Lactobacillus\_oris  
152.s\_\_Lactobacillus\_otakiensis  
153.s\_\_Lactobacillus\_parafarraginis  
154.s\_\_Lactobacillus\_plantarum  
155.s\_\_Lactobacillus\_reuteri  
156.s\_\_Lactobacillus\_rhamnosus  
157.s\_\_Lactobacillus\_rossiae  
158.s\_\_Lactobacillus\_ruminis



159.s\_\_Lactobacillus\_sakei  
160.s\_\_Lactobacillus\_salivarius  
161.s\_\_Lactobacillus\_vaginalis  
162.s\_\_Lactobacillus\_versmoldensis  
163.s\_\_Lactobacillus\_zeae  
164.s\_\_Pediococcus\_acidilactici  
165.s\_\_Pediococcus\_lolii  
166.s\_\_Pediococcus\_pentosaceus  
167.s\_\_Pediococcus\_unclassified  
168.s\_\_Leuconostoc\_citreum  
169.s\_\_Leuconostoc\_lactis  
170.s\_\_Leuconostoc\_mesenteroides  
171.s\_\_Leuconostoc\_pseudomesenteroides  
172.s\_\_Leuconostoc\_unclassified  
173.s\_\_Weissella\_cibaria  
174.s\_\_Weissella\_confusa  
175.s\_\_Weissella\_paramesenteroides  
176.s\_\_Weissella\_unclassified  
177.s\_\_Lactococcus\_garvieae  
178.s\_\_Lactococcus\_lactis  
179.s\_\_Lactococcus\_raffinolactis  
180.s\_\_Streptococcus\_agalactiae  
181.s\_\_Streptococcus\_anginosus  
182.s\_\_Streptococcus\_australis  
183.s\_\_Streptococcus\_constellatus  
184.s\_\_Streptococcus\_dysgalactiae  
185.s\_\_Streptococcus\_gallolyticus  
186.s\_\_Streptococcus\_gordonii  
187.s\_\_Streptococcus\_infantarius  
188.s\_\_Streptococcus\_infantis  
189.s\_\_Streptococcus\_intermedius  
190.s\_\_Streptococcus\_lutetiensis  
191.s\_\_Streptococcus\_macedonicus  
192.s\_\_Streptococcus\_mitis\_oralis\_pneumoniae  
193.s\_\_Streptococcus\_mutans  
194.s\_\_Streptococcus\_parasanguinis  
195.s\_\_Streptococcus\_parauberis  
196.s\_\_Streptococcus\_pasteurianus  
197.s\_\_Streptococcus\_peroris  
198.s\_\_Streptococcus\_pseudopneumoniae  
199.s\_\_Streptococcus\_salivarius  
200.s\_\_Streptococcus\_sanguinis

201.s\_\_Streptococcus\_sobrinus  
202.s\_\_Streptococcus\_sp\_C150  
203.s\_\_Streptococcus\_sp\_GMD4S  
204.s\_\_Streptococcus\_thermophilus  
205.s\_\_Streptococcus\_tigurinus  
206.s\_\_Streptococcus\_vestibularis  
207.s\_\_Butyricicoccus\_pullicaecorum  
208.s\_\_Clostridiaceae\_bacterium\_JC118  
209.s\_\_Clostridium\_asparagiforme  
210.s\_\_Clostridium\_bolteae  
211.s\_\_Clostridium\_butyricum  
212.s\_\_Clostridium\_celatum  
213.s\_\_Clostridium\_citroniae  
214.s\_\_Clostridium\_clostridioforme  
215.s\_\_Clostridium\_hathewayi  
216.s\_\_Clostridium\_hylemonae  
217.s\_\_Clostridium\_leptum  
218.s\_\_Clostridium\_methylpentosum  
219.s\_\_Clostridium\_nexile  
220.s\_\_Clostridium\_perfringens  
221.s\_\_Clostridium\_phytofermentans  
222.s\_\_Clostridium\_scindens  
223.s\_\_Clostridium\_sp\_7\_2\_43FAA  
224.s\_\_Clostridium\_sp\_ATCC\_BAA\_442  
225.s\_\_Clostridium\_sp\_KLE\_1755  
226.s\_\_Clostridium\_sp\_L2\_50  
227.s\_\_Clostridium\_sp\_MSTE9  
228.s\_\_Clostridium\_sp\_SS2\_1  
229.s\_\_Clostridium\_sporogenes  
230.s\_\_Clostridium\_symbiosum  
231.s\_\_Clostridium\_tyrobutyricum  
232.s\_\_Anaerococcus\_hydrogenalis  
233.s\_\_Anaerococcus\_obesiensis  
234.s\_\_Anaerococcus\_prevotii  
235.s\_\_Anaerococcus\_tetradus  
236.s\_\_Anaerococcus\_vaginalis  
237.s\_\_Finegoldia\_magna  
238.s\_\_Parvimonas\_unclassified  
239.s\_\_Peptoniphilus\_harei  
240.s\_\_Peptoniphilus\_lacrimalis  
241.s\_\_Clostridiales\_bacterium\_1\_7\_47FAA  
242.s\_\_Flavonifractor\_plautii

243.s\_Pseudoflavonifractor\_capillosus  
244.s\_Anaerofustis\_stercorihominis  
245.s\_Eubacterium\_brachy  
246.s\_Eubacterium\_eligens  
247.s\_Eubacterium\_hallii  
248.s\_Eubacterium\_limosum  
249.s\_Eubacterium\_ramulus  
250.s\_Eubacterium\_rectale  
251.s\_Eubacterium\_siraeum  
252.s\_Eubacterium\_sp\_3\_1\_31  
253.s\_Eubacterium\_ventriosum  
254.s\_Pseudoramibacter\_alactolyticus  
255.s\_Anaerostipes\_caccae  
256.s\_Anaerostipes\_hadrus  
257.s\_Anaerostipes\_sp\_3\_2\_56FAA  
258.s\_Anaerostipes\_unclassified  
259.s\_Blautia\_hansenii  
260.s\_Blautia\_hydrogenotrophica  
261.s\_Blautia\_producta  
262.s\_Ruminococcus\_gnavus  
263.s\_Ruminococcus\_obeum  
264.s\_Ruminococcus\_torques  
265.s\_Butyrvibrio\_crossotus  
266.s\_Butyrvibrio\_unclassified  
267.s\_Cellulosilyticum\_lentocellum  
268.s\_Coprococcus\_catus  
269.s\_Coprococcus\_comes  
270.s\_Coprococcus\_eutactus  
271.s\_Coprococcus\_sp\_ART55\_1  
272.s\_Dorea\_formicigenerans  
273.s\_Dorea\_longicatena  
274.s\_Dorea\_unclassified  
275.s\_Lachnospiraceae\_bacterium\_1\_1\_57FAA  
276.s\_Lachnospiraceae\_bacterium\_1\_4\_56FAA  
277.s\_Lachnospiraceae\_bacterium\_2\_1\_58FAA  
278.s\_Lachnospiraceae\_bacterium\_3\_1\_46FAA  
279.s\_Lachnospiraceae\_bacterium\_3\_1\_57FAA\_CT1  
280.s\_Lachnospiraceae\_bacterium\_4\_1\_37FAA  
281.s\_Lachnospiraceae\_bacterium\_5\_1\_57FAA  
282.s\_Lachnospiraceae\_bacterium\_5\_1\_63FAA  
283.s\_Lachnospiraceae\_bacterium\_6\_1\_63FAA  
284.s\_Lachnospiraceae\_bacterium\_7\_1\_58FAA

285.s\_Lachnospiraceae\_bacterium\_8\_1\_57FAA  
286.s\_Lachnospiraceae\_bacterium\_9\_1\_43BFAA  
287.s\_Lachnospiraceae\_bacterium\_ICM7  
288.s\_Lachnospiraceae\_bacterium\_oral\_taxon\_082  
289.s\_Roseburia\_hominis  
290.s\_Roseburia\_intestinalis  
291.s\_Roseburia\_inulinivorans  
292.s\_Roseburia\_unclassified  
293.s\_Oscillibacter\_sp\_KLE\_1728  
294.s\_Oscillibacter\_sp\_KLE\_1745  
295.s\_Oscillibacter\_unclassified  
296.s\_Clostridium\_bartlettii  
297.s\_Clostridium\_difficile  
298.s\_Clostridium\_hiranonis  
299.s\_Clostridium\_sordellii  
300.s\_Peptostreptococcaceae\_noname\_unclassified  
301.s\_Peptostreptococcus\_anaerobius  
302.s\_Peptostreptococcus\_stomatis  
303.s\_Peptostreptococcus\_unclassified  
304.s\_Anaerotruncus\_colihominis  
305.s\_Anaerotruncus\_unclassified  
306.s\_Faecalibacterium\_prausnitzii  
307.s\_Ruminococcaceae\_bacterium\_D16  
308.s\_Ruminococcus\_albus  
309.s\_Ruminococcus\_bromii  
310.s\_Ruminococcus\_callidus  
311.s\_Ruminococcus\_champanellensis  
312.s\_Ruminococcus\_flavefaciens  
313.s\_Ruminococcus\_lactaris  
314.s\_Ruminococcus\_sp\_5\_1\_39BFAA  
315.s\_Subdoligranulum\_sp\_4\_3\_54A2FAA  
316.s\_Subdoligranulum\_unclassified  
317.s\_Subdoligranulum\_variabile  
318.s\_Catenibacterium\_mitsuokai  
319.s\_Coprobacillus\_sp\_29\_1  
320.s\_Coprobacillus\_sp\_D6  
321.s\_Coprobacillus\_unclassified  
322.s\_Clostridium\_innocuum  
323.s\_Clostridium\_amosum  
324.s\_Clostridium\_spiroforme  
325.s\_Erysipelotrichaceae\_bacterium\_21\_3  
326.s\_Erysipelotrichaceae\_bacterium\_2\_2\_44A

|           |                  |                                                                                                                                                                                                                                                                                                                                                                                                                                                                                                                                                                                                                                                                                                                                                                                                                                                                                                                                                                                                                                                                                                                                                                                                                                                                                                                                                                                                   |
|-----------|------------------|---------------------------------------------------------------------------------------------------------------------------------------------------------------------------------------------------------------------------------------------------------------------------------------------------------------------------------------------------------------------------------------------------------------------------------------------------------------------------------------------------------------------------------------------------------------------------------------------------------------------------------------------------------------------------------------------------------------------------------------------------------------------------------------------------------------------------------------------------------------------------------------------------------------------------------------------------------------------------------------------------------------------------------------------------------------------------------------------------------------------------------------------------------------------------------------------------------------------------------------------------------------------------------------------------------------------------------------------------------------------------------------------------|
|           |                  | <p>327.s__Erysipelotrichaceae_bacterium_3_1_53<br/> 328.s__Erysipelotrichaceae_bacterium_5_2_54FAA<br/> 329.s__Erysipelotrichaceae_bacterium_6_1_45<br/> 330.s__Eubacterium_biforme<br/> 331.s__Eubacterium_cylindroides<br/> 332.s__Eubacterium_dolichum<br/> 333.s__Holdemania_filiformis<br/> 334.s__Holdemania_sp_AP2<br/> 335.s__Holdemania_unclassified<br/> 336.s__Solobacterium_moorei<br/> 337.s__Turcibacter_sanguinis<br/> 338.s__Turcibacter_unclassified<br/> 339.s__Acidaminococcus_fermentans<br/> 340.s__Acidaminococcus_intestini<br/> 341.s__Acidaminococcus_sp_HPA0509<br/> 342.s__Acidaminococcus_unclassified<br/> 343.s__Phascolarctobacterium_succinatutens<br/> 344.s__Anaeroglobus_geminatus<br/> 345.s__Dialister_invisus<br/> 346.s__Dialister_micraerophilus<br/> 347.s__Dialister_succinatiphilus<br/> 348.s__Megamonas_funiformis<br/> 349.s__Megamonas_hypermegale<br/> 350.s__Megamonas_rupellensis<br/> 351.s__Megamonas_unclassified<br/> 352.s__Megasphaera_elsdenii<br/> 353.s__Megasphaera_micronuciformis<br/> 354.s__Megasphaera_unclassified<br/> 355.s__Mitsuokella_multacida<br/> 356.s__Mitsuokella_unclassified<br/> 357.s__Selenomonas_artemidis<br/> 358.s__Selenomonas_noxia<br/> 359.s__Veillonella_atypica<br/> 360.s__Veillonella_dispar<br/> 361.s__Veillonella_parvula<br/> 362.s__Veillonella_ratti<br/> 363.s__Veillonella_unclassified</p> |
| Cluster 3 | p_Bacterioidetes | <p>364. s__Bacteroides_barnesiae<br/> 365.s__Bacteroides_caccae<br/> 366.s__Bacteroides_cellulosilyticus<br/> 367.s__Bacteroides_clarus</p>                                                                                                                                                                                                                                                                                                                                                                                                                                                                                                                                                                                                                                                                                                                                                                                                                                                                                                                                                                                                                                                                                                                                                                                                                                                       |

368.s\_\_Bacteroides\_coprocola  
369.s\_\_Bacteroides\_coprophilus  
370.s\_\_Bacteroides\_dorei  
371.s\_\_Bacteroides\_eggerthii  
372.s\_\_Bacteroides\_faecis  
373.s\_\_Bacteroides\_finegoldii  
374.s\_\_Bacteroides\_fragilis  
375.s\_\_Bacteroides\_intestinalis  
376.s\_\_Bacteroides\_massiliensis  
377.s\_\_Bacteroides\_nordii  
378.s\_\_Bacteroides\_oleiciplenus  
379.s\_\_Bacteroides\_ovatus  
380.s\_\_Bacteroides\_plebeius  
381.s\_\_Bacteroides\_salanitronis  
382.s\_\_Bacteroides\_salyersiae  
383.s\_\_Bacteroides\_sp\_1\_1\_6  
384.s\_\_Bacteroides\_sp\_2\_1\_22  
385.s\_\_Bacteroides\_sp\_2\_1\_33B  
386.s\_\_Bacteroides\_sp\_2\_1\_56FAA  
387.s\_\_Bacteroides\_sp\_3\_1\_19  
388.s\_\_Bacteroides\_sp\_3\_2\_5  
389.s\_\_Bacteroides\_sp\_4\_3\_47FAA  
390.s\_\_Bacteroides\_stercoris  
391.s\_\_Bacteroides\_thetaiotaomicron  
392.s\_\_Bacteroides\_uniformis  
393.s\_\_Bacteroides\_vulgatus  
394.s\_\_Bacteroides\_xylanisolvans  
395.s\_\_Bacteroidales\_bacterium\_ph8  
396.s\_\_Barnesiella\_intestinihominis  
397.s\_\_Butyricimonas\_synergistica  
398.s\_\_Coprobacter\_fastidiosus  
399.s\_\_Dysgonomonas\_gadei  
400.s\_\_Dysgonomonas\_mossii  
401.s\_\_Dysgonomonas\_unclassified  
402.s\_\_Odoribacter\_splanchnicus  
403.s\_\_Odoribacter\_unclassified  
404.s\_\_Parabacteroides\_distasonis  
405.s\_\_Parabacteroides\_goldsteinii  
406.s\_\_Parabacteroides\_johnsonii  
407.s\_\_Parabacteroides\_merdae  
408.s\_\_Parabacteroides\_sp\_D13  
409.s\_\_Parabacteroides\_unclassified

|           |                    |                                                                                                                                                                                                                                                                                                                                                                                                                                                                                                                                                                                                                                                                                                                                                                                                                                                                                                                                                                                                                                                                                                                                                                                                                                                                                                                                                     |
|-----------|--------------------|-----------------------------------------------------------------------------------------------------------------------------------------------------------------------------------------------------------------------------------------------------------------------------------------------------------------------------------------------------------------------------------------------------------------------------------------------------------------------------------------------------------------------------------------------------------------------------------------------------------------------------------------------------------------------------------------------------------------------------------------------------------------------------------------------------------------------------------------------------------------------------------------------------------------------------------------------------------------------------------------------------------------------------------------------------------------------------------------------------------------------------------------------------------------------------------------------------------------------------------------------------------------------------------------------------------------------------------------------------|
|           |                    | 410.s__Porphyromonas_asaccharolytica<br>411.s__Porphyromonas_bennonis<br>412.s__Porphyromonas_endodontalis<br>413.s__Porphyromonas_somerae<br>414.s__Porphyromonas_uenonis<br>415.s__Tannerella_forsythia<br>416.s__Alloprevotella_tannerae<br>417.s__Alloprevotella_unclassified<br>418.s__Paraprevotella_clara<br>419.s__Paraprevotella_unclassified<br>420.s__Paraprevotella_xylaniphila<br>421.s__Prevotella_amnii<br>422.s__Prevotella_bergensis<br>423.s__Prevotella_bivia<br>424.s__Prevotella_buccae<br>425.s__Prevotella_buccalis<br>426.s__Prevotella_copri<br>427.s__Prevotella_disiens<br>428.s__Prevotella_histicola<br>429.s__Prevotella_loescheii<br>430.s__Prevotella_melaninogenica<br>431.s__Prevotella_micans<br>432.s__Prevotella_nanceiensis<br>433.s__Prevotella_nigrescens<br>434.s__Prevotella_oralis<br>435.s__Prevotella_oris<br>436.s__Prevotella_oulorum<br>437.s__Prevotella_stercorea<br>438.s__Prevotella_timonensis<br>439.s__Alistipes_finegoldii<br>440.s__Alistipes_indistinctus<br>441.s__Alistipes_onderdonkii<br>442.s__Alistipes_putredinis<br>443.s__Alistipes_senegalensis<br>444.s__Alistipes_shahii<br>445.s__Alistipes_sp_AP11<br>446.s__Alistipes_sp_HGB5<br>447.s__Alistipes_unclassified<br>448.s__Capnocytophaga_unclassified<br>449.s__Cellulophaga_unclassified<br>450.s__Pedobacter_unclassified |
| Cluster 4 | 1. p_Acidobacteria | 452. s__Granulicella_unclassified                                                                                                                                                                                                                                                                                                                                                                                                                                                                                                                                                                                                                                                                                                                                                                                                                                                                                                                                                                                                                                                                                                                                                                                                                                                                                                                   |

|                               |                                                         |
|-------------------------------|---------------------------------------------------------|
| 2. p_Chlorobi                 | 453. s__Chlorobium_phaeobacteroides                     |
| 3. p_Deinococcus_Thermus      | 454. s__Deinococcus_unclassified                        |
| 4. p_Synergistetes            | 455. s__Pyramidobacter_piscolens                        |
| 5. p_Tenericutes              | 456. s__Candidatus_Phytoplasma_unclassified             |
| 6. p_Verrucomicrobia          | 457. s__Akkermansia_muciniphila                         |
| 7. p_Fusobacteria             | 458. s__Cetobacterium_somerae                           |
|                               | 459. s__Fusobacterium_gonidiaformans                    |
|                               | 460. s__Fusobacterium_mortiferum                        |
|                               | 461. s__Fusobacterium_nucleatum                         |
|                               | 462. s__Fusobacterium_periodonticum                     |
|                               | 463. s__Fusobacterium_ulcerans                          |
|                               | 464. s__Fusobacterium_varium                            |
|                               | 465. s__Leptotrichia_unclassified                       |
|                               | 466. s__Leptotrichia_wadei                              |
|                               | 467. s__Pyramidobacter_piscolens                        |
| 8.                            | 468. s__candidate_division_TM7_single_cell_isolate_TM7b |
| p_Candidatus_Saccharibacteria | 469. s__candidate_division_TM7_single_cell_isolate_TM7c |
| 9. p_Actinobacteria           | 470. s__Actinobaculum_massiliense                       |
|                               | 471.s__Actinobaculum_schaalii                           |
|                               | 472.s__Actinobaculum_unclassified                       |
|                               | 473.s__Actinomyces_europaeus                            |
|                               | 474.s__Actinomyces_graevenitzii                         |
|                               | 475.s__Actinomyces_johnsonii                            |
|                               | 476.s__Actinomyces_naeslundii                           |
|                               | 477.s__Actinomyces_neuii                                |
|                               | 478.s__Actinomyces_odontolyticus                        |
|                               | 479.s__Actinomyces_sp_HPA0247                           |
|                               | 480.s__Actinomyces_turicensis                           |
|                               | 481.s__Actinomyces_urogenitalis                         |
|                               | 482.s__Actinomyces_viscosus                             |
|                               | 483.s__Varibaculum_cambriense                           |
|                               | 484.s__Brevibacterium_unclassified                      |
|                               | 485.s__Corynebacterium_accolens                         |
|                               | 486.s__Corynebacterium_durum                            |
|                               | 487.s__Corynebacterium_kroppenstedtii                   |
|                               | 488.s__Corynebacterium_propinquum                       |
|                               | 489.s__Corynebacterium_pseudodiphtheriticum             |
|                               | 490.s__Gordonia_otitidis                                |
|                               | 491.s__Rothia_mucilaginosa                              |
|                               | 492.s__Rothia_unclassified                              |
|                               | 493.s__Propionibacterium_acnes                          |



494.s\_\_Propionibacterium\_avidum  
495.s\_\_Propionibacterium\_freudenreichii  
496.s\_\_Propionibacterium\_granulosum  
497.s\_\_Propionimicrobium\_lymphophilum  
498.s\_\_Alloscardovia\_omnicolens  
499.s\_\_Bifidobacterium\_adolescentis  
500.s\_\_Bifidobacterium\_angulatum  
501.s\_\_Bifidobacterium\_animalis  
502.s\_\_Bifidobacterium\_bifidum  
503.s\_\_Bifidobacterium\_breve  
504.s\_\_Bifidobacterium\_catenulatum  
505.s\_\_Bifidobacterium\_dentium  
506.s\_\_Bifidobacterium\_longum  
507.s\_\_Bifidobacterium\_pseudocatenulatum  
508.s\_\_Bifidobacterium\_pseudolongum  
509.s\_\_Gardnerella\_vaginalis  
510.s\_\_Parascardovia\_denticolens  
511.s\_\_Scardovia\_unclassified  
512.s\_\_Scardovia\_wiggisiae  
513.s\_\_Adlercreutzia\_equolifaciens  
514.s\_\_Atopobium\_minutum  
515.s\_\_Atopobium\_parvulum  
516.s\_\_Atopobium\_rimae  
517.s\_\_Atopobium\_vaginae  
518.s\_\_Collinsella\_aerofaciens  
519.s\_\_Collinsella\_intestinalis  
520.s\_\_Collinsella\_stercoris  
521.s\_\_Collinsella\_tanakaei  
522.s\_\_Collinsella\_unclassified  
523.s\_\_Coriobacteriaceae\_bacterium\_BV3Ac1  
524.s\_\_Coriobacteriaceae\_bacterium\_phI  
525.s\_\_Cryptobacterium\_curtum  
526.s\_\_Eggerthella\_lenta  
527.s\_\_Eggerthella\_sp\_1\_3\_56FAA  
528.s\_\_Eggerthella\_unclassified  
529.s\_\_Enterorhabdus\_caecimuris  
530.s\_\_Gordonibacter\_pamelaeae  
531.s\_\_Olsenella\_uli  
532.s\_\_Olsenella\_unclassified  
533.s\_\_Slackia\_exigua  
534.s\_\_Slackia\_piriformis

Supplementary Table 3: Association of environmental variables to various allergy outcomes in the DIABIMMUNE three country cohort.

(a)

| Variables              |           | Milk Allergy  |                | p-value |
|------------------------|-----------|---------------|----------------|---------|
|                        |           | Cases         | Controls       |         |
| Mean age in days (sd)  |           | 413<br>(286)  | 442<br>(241)   | 0.32    |
| Sex (N (%))            | Male      | 30<br>(58.8%) | 77<br>(53.4%)  | 0.51    |
|                        | Female    | 21<br>(41.8%) | 67<br>(46.5%)  |         |
| Delivery Type (N (%))  | Caesarean | 3<br>(5.8%)   | 14<br>(9.7%)   | 0.40    |
|                        | Vaginal   | 48<br>(94.1%) | 130<br>(90.2%) |         |
| Ethnicity (N (%))      | Estonia   | 21<br>(41.1%) | 49<br>(34%)    | <0.001  |
|                        | Finland   | 27<br>(52.9%) | 44<br>(30.5%)  |         |
|                        | Russia    | 3<br>(5.8%)   | 51<br>(34.5%)  |         |
| Breast Feeding (N (%)) | Yes       | 9<br>(17.6%)  | 93<br>(64.5%)  | 0.02    |
|                        | No        | 42<br>(82.3%) | 51<br>(35.4%)  |         |

(b)

| Variables              |           | Egg Allergy   |                | p-value |
|------------------------|-----------|---------------|----------------|---------|
|                        |           | Cases         | Controls       |         |
| Mean age in days (sd)  |           | 471<br>(318)  | 426<br>(236)   | 0.75    |
| Sex (N (%))            | Male      | 19<br>(51.3%) | 70<br>(44.3%)  | 0.76    |
|                        | Female    | 18<br>(48.6%) | 88<br>(55.7%)  |         |
| Delivery Type (N (%))  | Caesarean | 2<br>(5.4%)   | 15<br>(9.4%)   | 0.63    |
|                        | Vaginal   | 35<br>(94.5%) | 143<br>(90.5%) |         |
| Ethnicity (N (%))      | Estonia   | 10<br>(27%)   | 60<br>(37.9%)  | 0.01    |
|                        | Finland   | 21<br>(56.7%) | 50<br>(31.6%)  |         |
|                        | Russia    | 6<br>(16.2%)  | 48<br>(30.3%)  |         |
| Breast Feeding (N (%)) | Yes       | 31<br>(83.7%) | 104<br>(65.8%) | 0.05    |
|                        | No        | 6<br>(16.2%)  | 54<br>(34.1%)  |         |

(c)

| Variables              |           | Peanut Allergy |                | p-value |
|------------------------|-----------|----------------|----------------|---------|
|                        |           | Cases          | Controls       |         |
| Mean age in days (sd)  |           | 383<br>(226)   | 437<br>(254)   | 0.41    |
| Sex (N (%))            | Male      | 5<br>(55.5%)   | 102<br>(54.8%) | 1       |
|                        | Female    | 4<br>(44.4%)   | 84<br>(45.1%)  |         |
| Delivery Type (N (%))  | Caesarean | 0<br>(0%)      | 17<br>(9.1%)   | 0.34    |
|                        | Vaginal   | 9<br>(100%)    | 169<br>(90.8%) |         |
| Ethnicity (N (%))      | Estonia   | 4<br>(44.4%)   | 66<br>(35.4%)  | 0.153   |
|                        | Finland   | 5<br>(55.5%)   | 66<br>(35.4%)  |         |
|                        | Russia    | 0<br>(0%)      | 54<br>(29%)    |         |
| Breast Feeding (N (%)) | Yes       | 5<br>(55.5%)   | 130<br>(69.8%) | 0.58    |
|                        | No        | 4<br>(44.4%)   | 56<br>(30.1%)  |         |

(d)

| Variables              |           | Overall Allergy |                | p-value |
|------------------------|-----------|-----------------|----------------|---------|
|                        |           | Cases           | Controls       |         |
| Mean age in days (sd)  |           | 431<br>(301)    | 437<br>(226)   | 0.46    |
| Sex (N (%))            | Male      | 38<br>(57.4%)   | 69<br>(53.4%)  | 0.69    |
|                        | Female    | 28<br>(42.4%)   | 60<br>(46.5%)  |         |
| Delivery Type (N (%))  | Caesarean | 3<br>(4.5%)     | 14<br>(10.8%)  | 0.22    |
|                        | Vaginal   | 63<br>(95.4%)   | 115<br>(89.1%) |         |
| Ethnicity (N (%))      | Estonia   | 24<br>(36.3%)   | 46<br>(35.6%)  | <0.001  |
|                        | Finland   | 34<br>(51.5%)   | 37<br>(28.6%)  |         |
|                        | Russia    | 8<br>(12.1%)    | 46<br>(35.6%)  |         |
| Breast Feeding (N (%)) | Yes       | 54<br>(81.8%)   | 81<br>(62.7%)  | 0.01    |
|                        | No        | 12<br>(18.1%)   | 48<br>(37.2%)  |         |

Supplementary Table 4: Distribution of samples into cases and controls, in each allergy outcome in the DIABIMMUNE three country cohort.

| Time point | Egg Allergy |          | Milk Allergy |          | Peanut Allergy |          | Combined Allergy |          |
|------------|-------------|----------|--------------|----------|----------------|----------|------------------|----------|
|            | Cases       | Controls | Cases        | Controls | Cases          | Controls | Cases            | Controls |
| T1 (6M)    | 28          | 79       | 41           | 66       | 6              | 101      | 51               | 56       |
| T2 (12M)   | 31          | 154      | 33           | 151      | 7              | 178      | 50               | 135      |
| T3 (18M)   | 35          | 162      | 46           | 151      | 12             | 185      | 61               | 136      |
| T4 (24M)   | 31          | 120      | 40           | 111      | 5              | 146      | 51               | 100      |
| T5 (30M)   | 13          | 37       | 15           | 35       | 3              | 48       | 20               | 30       |
| T6 (36M)   | 10          | 32       | 13           | 29       | 0              | 43       | 18               | 24       |

Supplementary Table 5: AUC values tabulated for neural network models on test set of DIABIM-MUNE three country cohort. The results are reported on considering model performance without (w/o) weight balancing in the neural network and with weight balancing in the neural network. Note the consistent increase in AUC as shown in column 3, 5, 7 and 9, using weight balancing.

| Methods     | Overall allergy          |                                | Milk Allergy             |                                | Egg Allergy              |                                | Peanut Allergy           |                                |
|-------------|--------------------------|--------------------------------|--------------------------|--------------------------------|--------------------------|--------------------------------|--------------------------|--------------------------------|
|             | AUC w/o weight balancing | AUC Test with weight balancing | AUC w/o weight balancing | AUC Test with weight balancing | AUC w/o weight balancing | AUC Test with weight balancing | AUC w/o weight balancing | AUC Test with weight balancing |
| CNN-LSTM    | 0.744                    | 0.762                          | 0.735                    | 0.741                          | 0.662                    | 0.673                          | 0.559                    | 0.585                          |
| LSTM        | 0.717                    | 0.734                          | 0.709                    | 0.715                          | 0.649                    | 0.653                          | 0.557                    | 0.569                          |
| taxoNN_corr | 0.695                    | 0.711                          | 0.687                    | 0.691                          | 0.635                    | 0.641                          | 0.553                    | 0.561                          |

Supplementary Table 6: Association of environmental variables to preterm birth outcome in the DiGiulio case-control study.

| <b>Variables</b>                                |                  | <b>Preterm birth</b>    |                            | <b>p-value</b> |
|-------------------------------------------------|------------------|-------------------------|----------------------------|----------------|
|                                                 |                  | <b>Cases<br/>(N=11)</b> | <b>Controls<br/>(N=29)</b> |                |
| Gestational Day Of Collection<br>(Median [IQR]) |                  | 88<br>[75, 127.5]       | 90<br>[78, 159]            | 0.59           |
| Race (N (%))                                    | American Indian  | 2 (18.2%)               | 1 (3.4%)                   | 0.25           |
|                                                 | Asian            | 1 (9.1%)                | 2 (6.9%)                   |                |
|                                                 | Black            | 1 (9.1%)                | 1 (3.4%)                   |                |
|                                                 | Caucasian        | 4 (36.4%)               | 18 (62.1%)                 |                |
|                                                 | Other            | 1 (9.1%)                | 5 (17.2%)                  |                |
|                                                 | Pacific Islander | 2 (18.2%)               | 1 (3.4%)                   |                |
| Ethnicity<br>(N (%))                            | Hispanic         | 2 (18.2%)               | 11 (37.9%)                 | 0.25           |
|                                                 | Non-Hispanic     | 9 (81.8%)               | 18 (62.1%)                 |                |

Supplementary Table 7: AUC as obtained by various feature extraction techniques combined with LSTM module to identify temporal dependency in DIABIMMUNE three country cohort with overall allergy as outcome. Alongwith conventional ML models, Multi dimensional feature selection [2] is also used for comparison against taxoNN for feature extraction.

| <b>Methods</b>      | <b>AUC</b>   |
|---------------------|--------------|
| LSTM+taxoNN         | <b>0.762</b> |
| LSTM+MDFS [2]       | 0.705        |
| LSTM+ Random Forest | 0.702        |
| LSTM+SVM            | 0.695        |
| LSTM+Lasso          | 0.682        |
| LSTM+CNN_basic      | 0.591        |

Supplementary Table 8: Comparison of AUC values obtained on the test set of OTUs from metagenomic dataset and 16s dataset of the DIABIMMUNE three country cohort on the 'Overall Allergy' outcome.

| <b>Methods</b>            | <b>AUC in Metagenomic dataset</b> | <b>AUC in 16s dataset</b> |
|---------------------------|-----------------------------------|---------------------------|
| phyLoSTM                  | <b>0.762</b>                      | <b>0.755</b>              |
| LSTM                      | 0.734                             | 0.729                     |
| taxoNN_corr               | 0.711                             | 0.713                     |
| Random Forest             | 0.639                             | 0.640                     |
| Support Vector Machines   | 0.611                             | 0.615                     |
| Ridge Regression          | 0.607                             | 0.611                     |
| Lasso Regression          | 0.603                             | 0.600                     |
| Gaussian Bayes Classifier | 0.601                             | 0.599                     |
| Naïve Bayes Classifier    | 0.609                             | 0.603                     |
| CNN_basic                 | 0.569                             | 0.552                     |

Supplementary Table 9: AUC values tabulated for various machine learning methods upon class based stratification for DIABIMMUNE three country and DiGiulio preterm studies.

| <b>Methods</b>            | <b>AUC in DIABIMMUNE three country cohort</b> | <b>AUC in DiGiulio Preterm study</b> |
|---------------------------|-----------------------------------------------|--------------------------------------|
| phyLoSTM                  | <b>0.667</b>                                  | <b>0.673</b>                         |
| LSTM                      | 0.659                                         | 0.671                                |
| taxoNN_corr               | 0.634                                         | 0.662                                |
| Random Forest             | 0.639                                         | 0.659                                |
| Support Vector Machines   | 0.611                                         | 0.641                                |
| Ridge Regression          | 0.607                                         | 0.634                                |
| Lasso Regression          | 0.603                                         | 0.630                                |
| Gaussian Bayes Classifier | 0.601                                         | 0.631                                |
| Naïve Bayes Classifier    | 0.609                                         | 0.624                                |
| CNN_basic                 | 0.569                                         | 0.604                                |



Supplementary Table 10: Comparison of AUCs as obtained by phyLoSTM methodology incorporating temporal data across 6 time points in the DIABIMMUNE cohort for the overall allergy outcome with conventional ML models taking data from individual time points as inputs.

| Methods                   | AUC across time points |            |            |            |            |            |
|---------------------------|------------------------|------------|------------|------------|------------|------------|
|                           | Timepoint1             | Timepoint2 | Timepoint3 | Timepoint4 | Timepoint5 | Timepoint6 |
| phyLoSTM                  | <b>0.762</b>           |            |            |            |            |            |
| LSTM                      | 0.734                  |            |            |            |            |            |
| taxoNN_corr               | 0.711                  | 0.707      | 0.700      | 0.691      | 0.684      | 0.680      |
| Random Forest             | 0.639                  | 0.641      | 0.631      | 0.629      | 0.619      | 0.611      |
| Support Vector Machines   | 0.611                  | 0.619      | 0.610      | 0.607      | 0.597      | 0.589      |
| Ridge Regression          | 0.607                  | 0.600      | 0.599      | 0.591      | 0.582      | 0.575      |
| Lasso Regression          | 0.603                  | 0.601      | 0.597      | 0.593      | 0.583      | 0.571      |
| Gaussian Bayes Classifier | 0.601                  | 0.600      | 0.599      | 0.591      | 0.585      | 0.572      |
| Naïve Bayes Classifier    | 0.609                  | 0.611      | 0.607      | 0.598      | 0.583      | 0.577      |
| CNN_basic                 | 0.569                  | 0.561      | 0.565      | 0.560      | 0.551      | 0.550      |

Supplementary Table 11: Comparison of AUCs as obtained by phyLoSTM methodology incorporating temporal data across 6 time points in the DiGiulio preterm study with conventional ML models taking data from individual time points as inputs.

|                           | AUC across time points |            |            |            |
|---------------------------|------------------------|------------|------------|------------|
| Methods                   | Timepoint1             | Timepoint2 | Timepoint3 | Timepoint4 |
| phyLoSTM                  | <b>0.713</b>           |            |            |            |
| LSTM                      | 0.692                  |            |            |            |
| taxoNN_corr               | 0.678                  | 0.672      | 0.668      | 0.658      |
| Random Forest             | 0.659                  | 0.650      | 0.644      | 0.640      |
| Support Vector Machines   | 0.641                  | 0.633      | 0.628      | 0.620      |
| Ridge Regression          | 0.634                  | 0.631      | 0.625      | 0.620      |
| Lasso Regression          | 0.630                  | 0.625      | 0.622      | 0.616      |
| Gaussian Bayes Classifier | 0.631                  | 0.622      | 0.619      | 0.615      |
| Naïve Bayes Classifier    | 0.624                  | 0.613      | 0.610      | 0.606      |
| CNN_basic                 | 0.604                  | 0.597      | 0.589      | 0.580      |

## 2 Supplementary Figures

Supplementary Figure 1: Heatmaps for the Spearman rank of the OTUs in the cluster, Phylum Proteobacteria, (a) before ordering and (b) after the ordering based on correlation of the OTUs in the DIABIMMUNE three country cohort

(a)

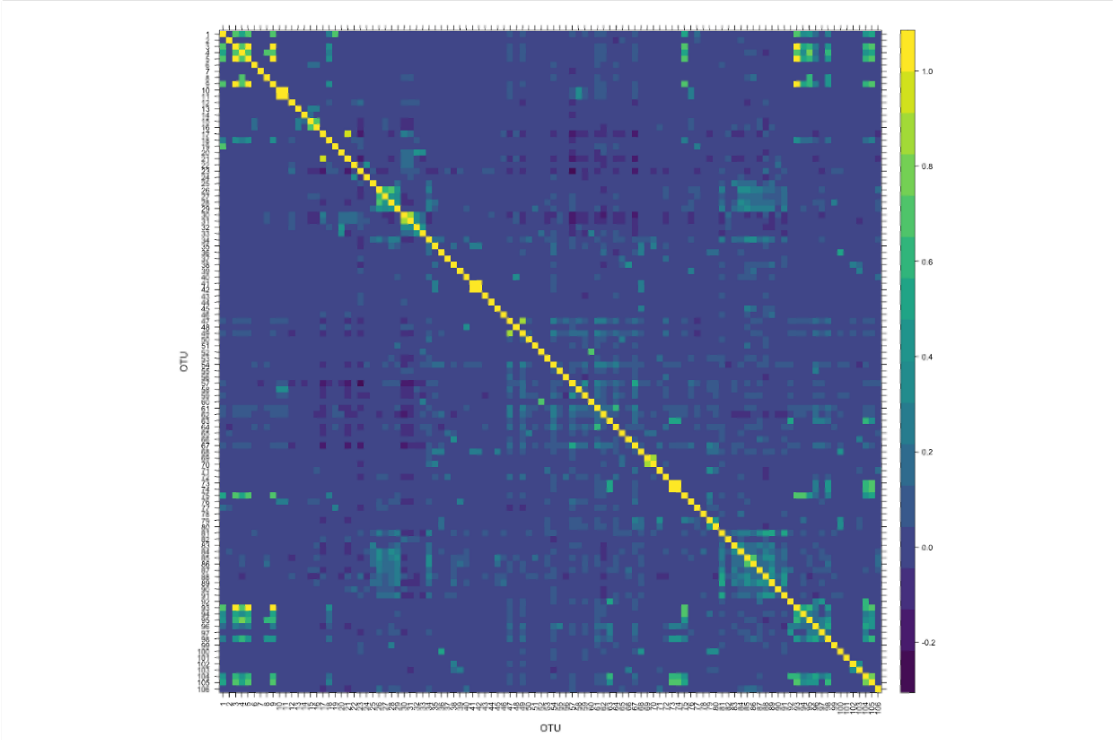

(b)

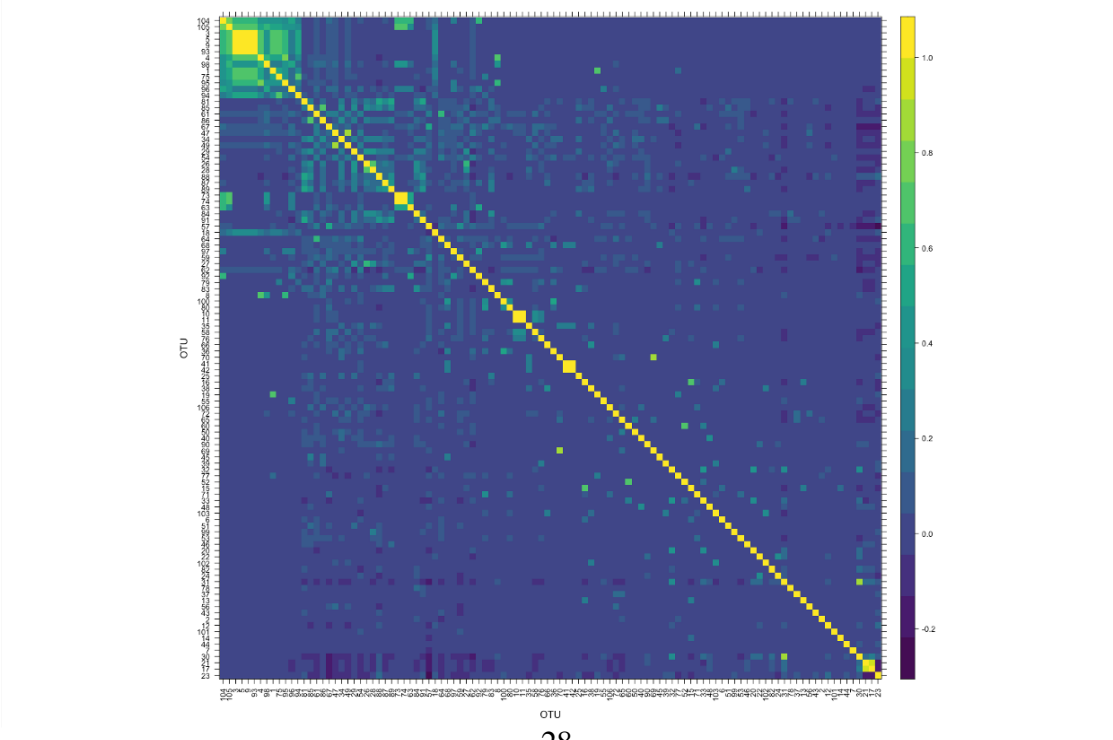

Supplementary Figure 2: Heatmaps for the Spearman rank of the OTUs in the cluster, Phylum Firmicutes, (a) before ordering and (b) after the ordering based on correlation of the OTUs in the DIABIMMUNE three country cohort

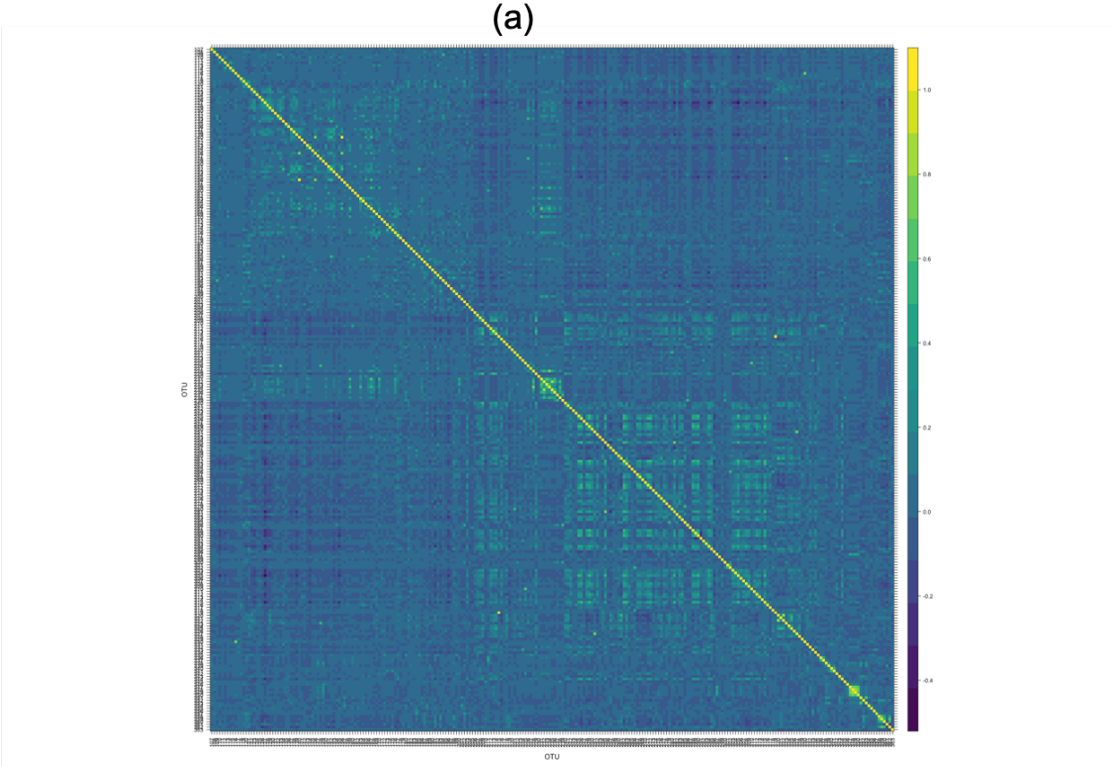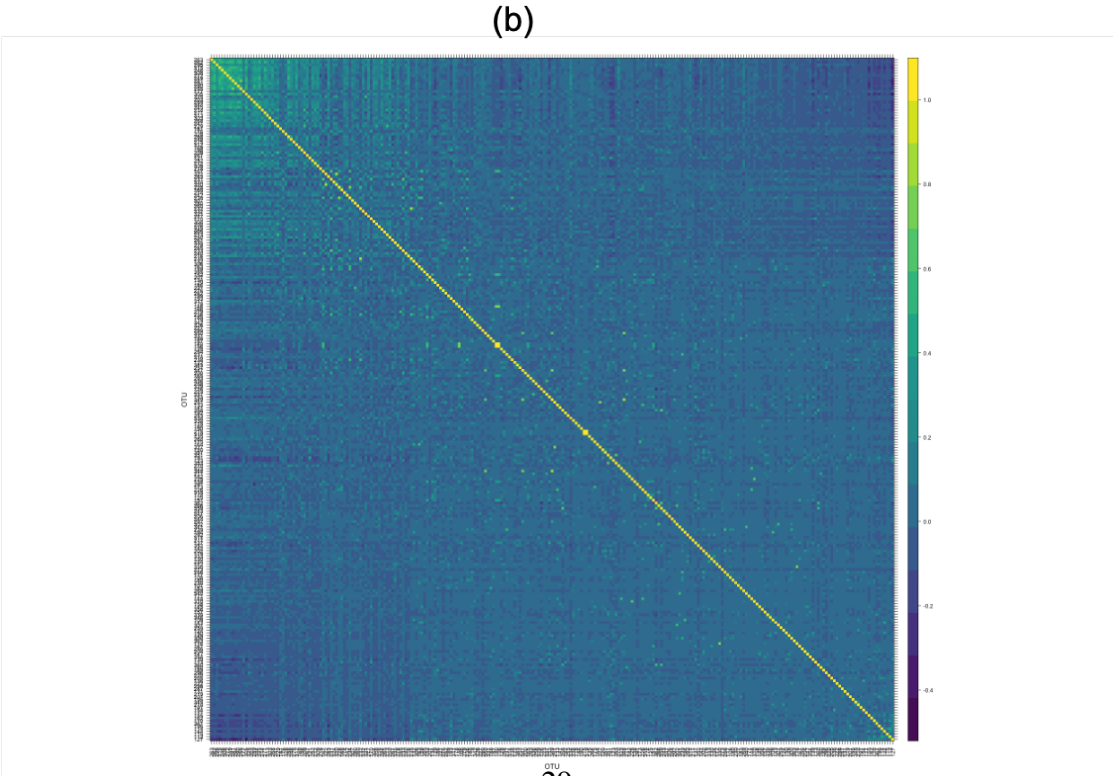

Supplementary Figure 3: Heatmaps for the Spearman rank of the OTUs in the cluster, Phylum Bacteroidetes, (a) before ordering and (b) after the ordering based on correlation of the OTUs in the DIABIMMUNE three country cohort

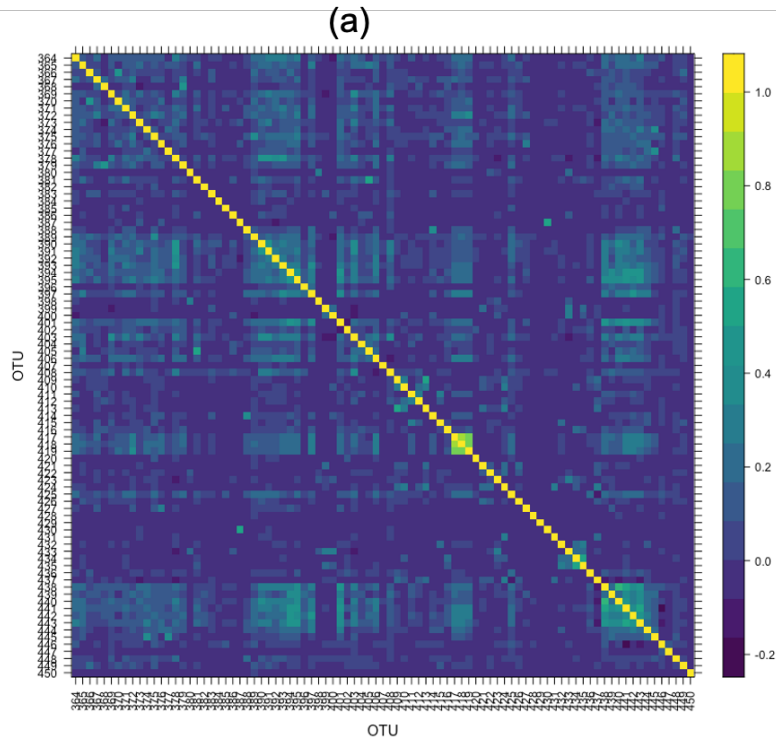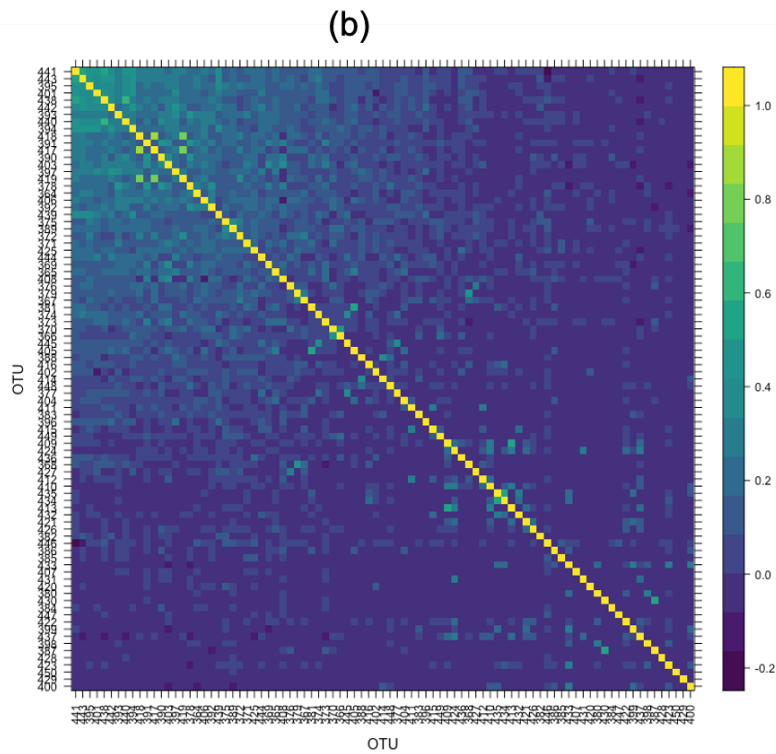

Supplementary Figure 4: Comparison of AUC values as observed at each individual 6 time points using *taxoNN<sub>corr</sub>* approach with the final higher AUC value of 0.897 using proposed phyLoSTM framework on the simulated study.

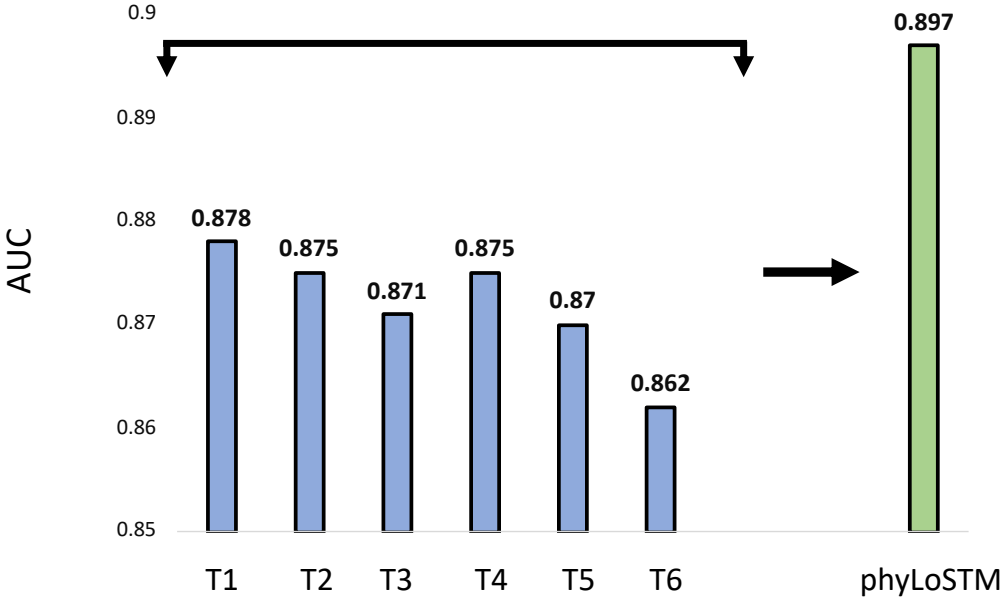

Supplementary Figure 5: Relative abundance of OTUs in each phylum of the DiGiulio study at four time points measured every three months. For each box plot the upper whisker extends from the hinge to the largest value no further than  $1.5 * IQR$  from the hinge (where IQR is the inter-quartile range, or distance between the first and third quartiles). The lower whisker extends from the hinge to the smallest value at most  $1.5 * IQR$  of the hinge. Data beyond the end of the whiskers are called "outlying" points and are plotted individually.

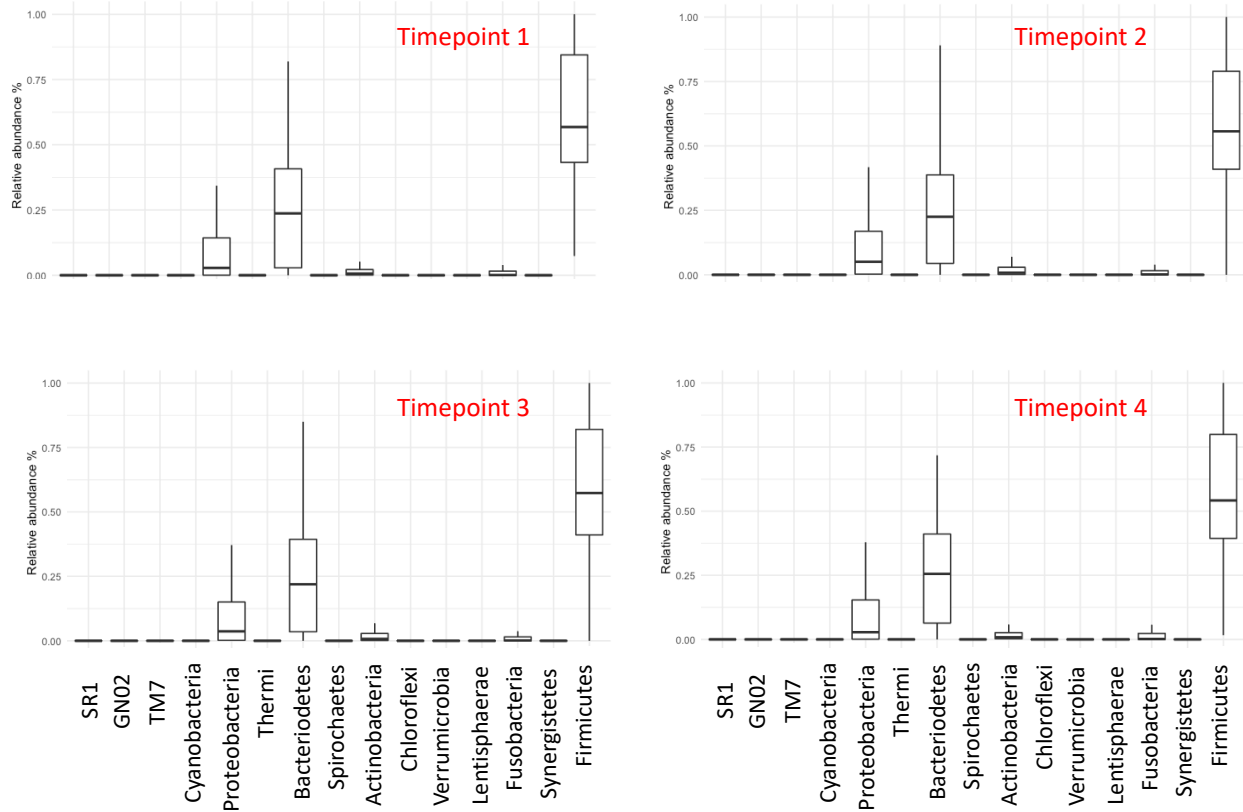



Supplementary Figure 6: 95% confidence intervals obtained for the mean AUC values for 10 times 10-fold cross validation on the training set for the DiGiulio study on the preterm delivery output [3]

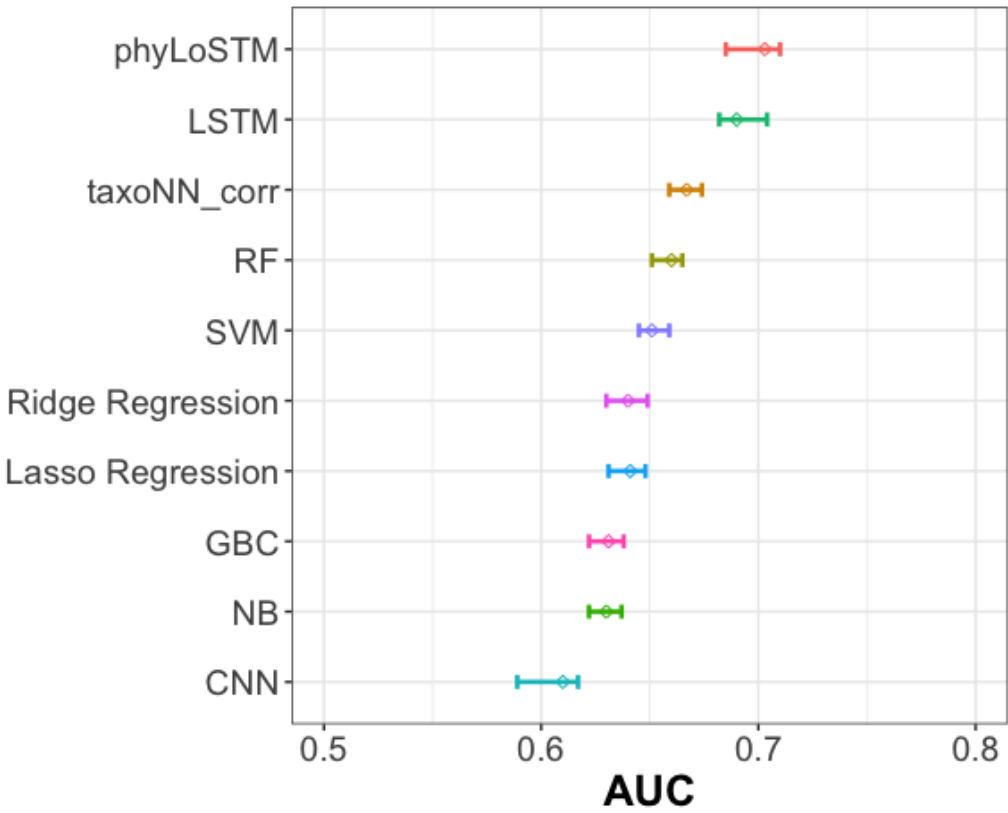

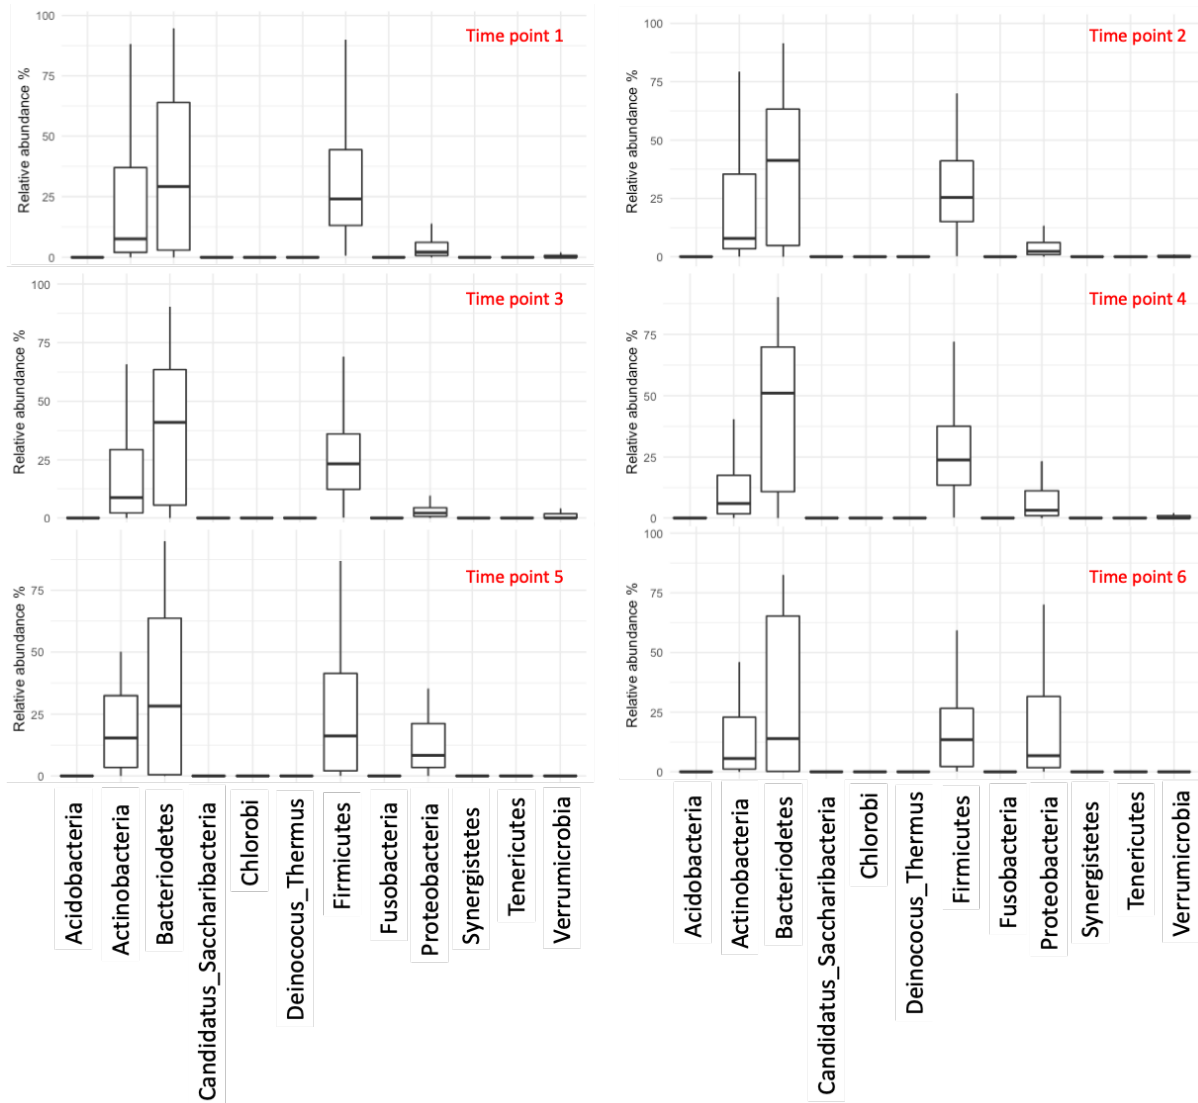

Supplementary Figure 7: Relative abundance of OTUs in each phylum of the DIABIMMUNE three country cohort at six time points measured half-yearly up to age of three of the infant. For each box plot the upper whisker extends from the hinge to the largest value no further than  $1.5 * IQR$  from the hinge (where IQR is the inter-quartile range, or distance between the first and third quartiles). The lower whisker extends from the hinge to the smallest value at most  $1.5 * IQR$  of the hinge.

### 3 References

- [1] Vatanen, T. *et al.* Variation in microbiome lps immunogenicity contributes to autoimmunity in humans. *Cell* **165**, 842–853 (2016).
- [2] Mnich, K. & Rudnicki, W. R. All-relevant feature selection using multidimensional filters with exhaustive search. *Information Sciences* **524**, 277–297 (2020).
- [3] DiGiulio, D. B. *et al.* Temporal and spatial variation of the human microbiota during pregnancy. *Proceedings of the National Academy of Sciences* **112**, 11060–11065 (2015).
